# Supplementary material for: Meta-analysis of substitution value of maize with cassava (Manihot esculenta Cratnz) on growth performance of broiler chickens
Source: Front Vet Sci. 2022 Nov 14;9:997128. doi: 10.3389/fvets.2022.997128 (PMC9701717; doi:10.3389/fvets.2022.997128)
Supplement: Supplementary file 3 [file Table_3.xlsx]

## Sheet: Feed intake
Reference	Country	Continent	Form	Method	Strain	Inclusion level	Replictions	Number per replicate	Duration	Outcome	Cont mean	Cont SD	Expt mean	Expt SD	N cont	Nexpt
Bhuiyan and Iji (2015)	Australia	Oceania	CRM	Drying	Cobb	51-60	>5	10	21	FI	45.17	4.517	35.95	3.595	64	64
Bhuiyan and Iji (2015)	Australia	Oceania	CRM	Drying	Cobb	51-60	>5	10	21	FI	45.17	4.517	55.36	5.536	64	64
Bhuiyan and Iji (2015)	Australia	Oceania	CRM + Enzyme	Drying + enzyme	Cobb	51-60	>5	10	21	FI	57.13	5.713	44.77	4.477	64	64
Bhuiyan and Iji (2015)	Australia	Oceania	CRM + Enzyme	Drying + enzyme	Cobb	51-60	>5	10	21	FI	57.13	5.713	55.38	5.538	64	64
Oyewole et al. (2020)	Nigeria	Africa	CRM	Drying		11.0-20			56	FI	100	10	101	10.1	30	30
Oyewole et al. (2020)	Nigeria	Africa	CRM	Drying		11.0-20			56	FI	100	10	102	10.2	30	30
Oyewole et al. (2020)	Nigeria	Africa	CRM	Drying		31-40			56	FI	100	10	103	10.3	30	30
Chang et al. (2020)	Australia	Oceania	CRM	Drying	Ross	11.0-20	>5	10	35	FI	92.89	9.289	98.62	9.862	60	60
Chang et al. (2020)	Australia	Oceania	CRM	Drying	Ross	31-40	>5	10	35	FI	92.89	9.289	97.46	9.746	60	60
Chang et al. (2020)	Australia	Oceania	CRM	Drying	Ross	41-50	>5	10	35	FI	92.89	9.289	97.41	9.741	60	60
Chang et al. (2020)	Australia	Oceania	CRM + Enzyme	Drying + enzyme	Ross	11.0-20	>6	10	35	FI	95.76	9.576	94.47	9.447	60	60
Chang et al. (2020)	Australia	Oceania	CRM + Enzyme	Drying + enzyme	Ross	31-40	>7	10	35	FI	95.76	9.576	100.31	10.031	60	60
Chang et al. (2020)	Australia	Oceania	CRM + Enzyme	Drying + enzyme	Ross	41-50	>8	10	35	FI	95.76	9.576	98.67	9.867	60	60
Yadav et al. (2019)	USA	North America	CRM	Drying	Cobb	11.0-20	>5	<10	42	FI	96.17	9.617	97.17	9.717	36	36
Yadav et al. (2019)	USA	North America	CRM	Drying	Cobb	21-30	>5	<10	42	FI	96.17	9.617	97.83	9.783	36	36
Yadav et al. (2019)	USA	North America	CRM	Drying	Cobb	31-40	>5	<10	42	FI	96.17	9.617	98.17	9.817	36	36
Yadav et al. (2019)	USA	North America	CRM	Drying	Cobb	41-50	>5	<10	42	FI	96.17	9.617	91.67	9.167	36	36
Ghomsi et al. (2017)	Cameroon	Africa	CPM	Drying	Arbor Acres	1.0-10	>5	>10	46	FI	81.91	8.191	82.63	8.263	86	86
Elnour et al. (2020)	Sudan	Africa	CRM	Drying	Ross	11.0-20	<5	10	35	FI	92.75	9.275	90.44	9.044	40	40
Elnour et al. (2020)	Sudan	Africa	CRM	Drying	Ross	21-30	<5	10	35	FI	92.75	9.275	92.52	9.252	40	40
Elnour et al. (2020)	Sudan	Africa	CRM	Drying	Ross	31-40	<5	10	35	FI	92.75	9.275	86.5	8.65	40	40
Hassan et al. (2012)	Nigeria	Africa	CRM	Drying	Marshal	11.0-20	<5	<10	56	FI	184.98	1.85	182.74	1.827	18	18
Hassan et al. (2012)	Nigeria	Africa	CRM	Drying	Marshal	31-40	<5	<10	56	FI	184.98	1.85	56.07	5.607	18	18
Hassan et al. (2012)	Nigeria	Africa	CRM	Drying	Marshal	41-50	<5	<10	56	FI	184.98	1.85	52.97	5.297	18	18
Hassan et al. (2012)	Nigeria	Africa	CRM	Drying	Marshal	51-60	<5	<10	56	FI	184.98	1.85	44.58	4.458	18	18
Zanu et al. (2017)	Ghana	Africa	CRM	Drying	Cobb	51-60	<5	>10	42	FI	122.23	12.22	111.87	11.187	45	45
Nsa et al. (2019)	Nigeria	Africa	CRM	Drying	Arbor Acres	11.0-20	<5	>10	42	FI	113.35	11.335	112.75	11.275	48	48
Nsa et al. (2019)	Nigeria	Africa	CRM	Drying	Arbor Acres	21-30	<5	>10	42	FI	113.35	11.335	102.31	10.231	48	48
Nsa et al. (2019)	Nigeria	Africa	CRM	Drying	Arbor Acres	41-50	<5	>10	42	FI	113.35	11.335	93.34	9.334	48	48
Nsa et al. (2019)	Nigeria	Africa	CRM	Drying	Arbor Acres	51-60	<5	>10	42	FI	113.35	11.335	85.94	8.594	48	48
Diarra et al. (2015)	Samoa	Oceania	CRM + Enzyme	Drying + enzyme	Cobb	31-40	<5	<10	42	FI	149.13	14.913	132.17	13.217	48	48
Olowoyeye (2022)	Nigeria	Africa	CPM+CLM	Drying	Marshal	11.0-20	5	10	42	FI	90.86	9.086	91.43	9.143	50	50
Olowoyeye (2022)	Nigeria	Africa	CPM+CLM	Drying	Marshal	11.0-20	5	10	42	FI	90.86	9.086	91.71	9.171	50	50
Olowoyeye (2022)	Nigeria	Africa	CPM+CLM	Drying	Marshal	11.0-20	5	10	42	FI	90.86	9.086	92	9.2	50	50
Olowoyeye (2022)	Nigeria	Africa	CPM+CLM	Drying	Marshal	21-30	5	10	42	FI	90.86	9.086	92	9.2	50	50
Olowoyeye (2022)	Nigeria	Africa	CPM+CLM	Drying	Marshal	21-30	5	10	42	FI	90.86	9.086	92	9.2	50	50
Ehebha and Eguaoje (2018)	Nigeria	Africa	CPM	Drying	Anak	11.0-20	<5	10	56	FI	120	12	116	11.6	30	30
Ehebha and Eguaoje (2018)	Nigeria	Africa	CPM	Drying	Anak	11.0-20	<5	10	56	FI	120	12	113.2	11.32	30	30
Ehebha and Eguaoje (2018)	Nigeria	Africa	CPM	Drying	Anak	21-30	<5	10	56	FI	120	12	110.42	11.04	30	30
Ogundu et al. (2017)	Nigeria	Africa	CRM	Drying	Anak	31-40	<5	<10	56	FI	54.07	5.407	49.32	4.932	24	24
Ogundu et al. (2017)	Nigeria	Africa	CRM	Drying	Anak	31-40	<5	<10	57	FI	54.07	5.407	48.88	4.888	24	24
Osei and Duodu (1988)	Ghana	Africa	WFCPM	WF + drying	Cobb	1.0-10	<5	<10	42	FI	31.2	3.12	33	3.3	120	120
Osei and Duodu (1988)	Ghana	Africa	WFCPM	WF + drying	Cobb	1.0-10	<5	<10	42	FI	31.2	3.12	33.4	3.34	120	120
Osei and Duodu (1988)	Ghana	Africa	WFCPM	WF + drying	Cobb	11.0-20	<5	<10	42	FI	31.2	3.12	33.2	3.32	120	120
Chukwukaelo et al.(2018)	Nigeria	Africa	SSFCRM	SSF+Drying		1.0-10	<5	10	56	FI	117.34	11.734	120.43	12.043	30	30
Chukwukaelo et al.(2018)	Nigeria	Africa	SSFCRM	SSF+Drying		11.0-20	<5	10	56	FI	117.34	11.734	114.57	11.457	30	30
Chukwukaelo et al.(2018)	Nigeria	Africa	SSFCRM	SSF+Drying		21-30	<5	10	56	FI	117.34	11.734	120.48	12.048	30	30
Chukwukaelo et al.(2018)	Nigeria	Africa	SSFCRM	SSF+Drying		31-40	<5	10	56	FI	117.34	11.734	122.72	12.272	30	30
Ewa et al. (2019)	Nigeria	Africa	CRS	Drying	Anak	11.0-20	<5	10	49	FI	86.46	8.646	86.05	8.605	30	30
Ewa et al. (2019)	Nigeria	Africa	CRS	Drying	Anak	11.0-20	<5	10	49	FI	86.46	8.646	82.11	8.211	30	30
Ewa et al. (2019)	Nigeria	Africa	CRS	Drying	Anak	11.0-20	<5	10	49	FI	86.46	8.646	81.56	8.156	30	30
Ewa et al. (2019)	Nigeria	Africa	CRS	Drying	Anak	11.0-20	<5	10	49	FI	86.46	8.646	81.7	8.17	30	30
Babatunde (2013)	Fiji	Oceania	CRW	Drying	Cobb	11.0-20	<5	10	46	FI	92.59	9.259	99.26	9.926	30	30
Babatunde (2013)	Fiji	Oceania	CRW	Drying	Cobb	11.0-20	<5	10	46	FI	92.59	9.259	93.33	9.333	30	30
Babatunde (2013)	Fiji	Oceania	CRW	Drying	Cobb	21-30	<5	10	46	FI	92.59	9.259	89.63	8.963	30	30
Ojewola et al. (2016)	Nigeria	Africa	WFCRM	WF + drying	Anak	1.0-10	<5	10	56	FI	92.36	9.236	98.9	9.89	20	20
Ojewola et al. (2016)	Nigeria	Africa	WFCRM	WF + drying	Anak	11.0-20	<5	10	56	FI	92.36	9.236	101.59	10.159	20	20
Ojewola et al. (2016)	Nigeria	Africa	WFCRM	WF + drying	Anak	11.0-20	<5	10	56	FI	92.36	9.236	100.59	10.059	20	20
Ojewola et al. (2016)	Nigeria	Africa	WFCRM	WF + drying	Anak	21-30	<5	10	56	FI	92.36	9.236	100.17	10.017	20	20
Ojewola et al. (2016)	Nigeria	Africa	WFCRM	WF + drying	Anak	21-30	<5	10	56	FI	92.36	9.236	97.52	9.752	20	20
Ojewola et al. (2016)	Nigeria	Africa	WFCRM	WF + drying	Anak	31-40	<5	10	56	FI	92.36	9.236	102.07	10.207	20	20
Ojewola et al. (2016)	Nigeria	Africa	WFCRM	WF + drying	Anak	41-50	<5	10	56	FI	92.36	9.236	94.57	9.457	20	20
Ojewola et al. (2016)	Nigeria	Africa	WFCRM	WF + drying	Anak	41-50	<5	10	56	FI	92.36	9.236	96.39	9.639	20	20
Ojewola et al. (2016)	Nigeria	Africa	WFCRM	WF + drying	Anak	51-60	<5	10	56	FI	92.36	9.236	95.62	9.562	20	20
Ojewola et al. (2016)	Nigeria	Africa	WFCRM	WF + drying	Anak	51-60	<5	10	56	FI	92.36	9.236	90.85	9.085	20	20
Midau et al. (2011)	Nigeria	Africa	CPM + Enzyme	Drying + enzyme	Anak	11.0-20	<5	<10	56	FI	102.73	10.273	103.33	10.333	24	24
Midau et al. (2011)	Nigeria	Africa	CPM + Enzyme	Drying + enzyme	Anak	21-30	<5	<10	56	FI	102.73	10.273	103.29	10.329	24	24
Midau et al. (2011)	Nigeria	Africa	CPM + Enzyme	Drying + enzyme	Anak	31-40	<5	<10	56	FI	102.73	10.273	98.31	9.831	24	24
Midau et al. (2011)	Nigeria	Africa	CPM + Enzyme	Drying + enzyme	Anak	41-50	<5	<10	56	FI	102.73	10.273	97.63	9.763	24	24
Aro et al. (2012)	Nigeria	Africa	SSFCPM	SSF+Drying	Ross	11.0-20	5	10	56	FI	65.28	6.528	70.37	7.037	50	50
Aro et al. (2012)	Nigeria	Africa	SSFCPM	SSF+Drying	Ross	31-40	5	10	56	FI	65.28	6.528	81.84	8.184	50	50
Aro et al. (2012)	Nigeria	Africa	SSFCPM	SSF+Drying	Ross	51-60	5	10	56	FI	65.28	6.528	86.11	8.611	50	50
Aro et al. (2012)	Nigeria	Africa	SSFCPM	SSF+Drying	Ross	11.0-20	5	10	56	FI	65.28	6.528	67.33	6.733	50	50
Aro et al. (2012)	Nigeria	Africa	SSFCPM	SSF+Drying	Ross	31-40	5	10	56	FI	65.28	6.528	57.57	5.757	50	50
Aro et al. (2012)	Nigeria	Africa	SSFCPM	SSF+Drying	Ross	51-60	5	10	56	FI	65.28	6.528	55.63	5.563	50	50
Abu et al. (2015)	Nigeria	Africa	CPM+CLM	Drying	Arbor Acres	11.0-20	<5	>10	49	FI	95.4	9.54	95.5	9.55	45	45
Tamburawa et al. (2019)	Nigeria	Africa	CRM	Drying	Marshal	1.0-10	<5	<10	56	FI	183.37	18.337	172.33	17.233	18	18
Tamburawa et al. (2019)	Nigeria	Africa	CRM	Drying	Marshal	11.0-20	<5	<10	56	FI	183.37	18.337	185.67	18.567	18	18
Tamburawa et al. (2019)	Nigeria	Africa	CRM	Drying	Marshal	21-30	<5	<10	56	FI	183.37	18.337	185.28	18.528	18	18
Tamburawa et al. (2019)	Nigeria	Africa	CRM	Drying	Marshal	31-40	<5	<10	56	FI	183.37	18.337	184.28	18.428	18	18
Adekeye et al (2021)	Nigeria	Africa	CPM	Drying	Arbor Acres	11.0-20	5	>10	42	FI	112.38	11.238	112.38	11.238	80	80
Adekeye et al (2021)	Nigeria	Africa	CPM	Drying	Arbor Acres	11.0-20	5	>10	42	FI	112.38	11.238	114.29	11.429	80	80
Adekeye et al (2021)	Nigeria	Africa	CPM	Drying	Arbor Acres	21-30	5	>10	42	FI	112.38	11.238	114.29	11.429	80	80
Adekeye et al (2021)	Nigeria	Africa	CPM	Drying	Arbor Acres	21-30	5	>10	42	FI	112.38	11.238	103.33	10.333	80	80

## Sheet: FCR
Reference	Country	Continent	Form	Method	Dose level	Number per replicate	Strain	Duration	Outcome	Cont mean	Cont SD	Expt mean	Expt SD	N cont	Nexpt
Bhuiyan and Iji (2015)	Australia	Oceania	CRM	Drying	51-60	10	Cobb	21	FCR	1.46	0.146	1.86	0.186	64	64
Bhuiyan and Iji (2015)	Australia	Oceania	CRM	Drying	51-60	10	Cobb	21	FCR	1.46	0.146	1.71	0.171	64	64
Bhuiyan and Iji (2015)	Australia	Oceania	CRM + Enzyme	Drying + enzyme	51-60	10	Cobb	21	FCR	1.44	0.144	1.79	0.179	64	64
Bhuiyan and Iji (2015)	Australia	Oceania	CRM + Enzyme	Drying + enzyme	51-60	10	Cobb	21	FCR	1.44	0.144	1.67	0.167	64	64
Oyewole et al. (2020)	Nigeria	Africa	CRM	Drying	11.0-20			56	FCR	2.42	0.242	2.45	0.245	30	30
Oyewole et al. (2020)	Nigeria	Africa	CRM	Drying	11.0-20			56	FCR	2.42	0.242	2.54	0.254	30	30
Oyewole et al. (2020)	Nigeria	Africa	CRM	Drying	31-40			56	FCR	2.42	0.242	2.6	0.26	30	30
Chang et al. (2020)	Australia	Oceania	CRM	Drying	11.0-20	10	Ross	35	FCR	1.14	0.114	1.52	0.152	60	60
Chang et al. (2020)	Australia	Oceania	CRM	Drying	31-40	10	Ross	35	FCR	1.14	0.114	1.69	0.169	60	60
Chang et al. (2020)	Australia	Oceania	CRM	Drying	41-50	10	Ross	35	FCR	1.14	0.114	1.72	0.172	60	60
Chang et al. (2020)	Australia	Oceania	CRM + Enzyme	Drying + enzyme	11.0-20	10	Ross	35	FCR	1.37	0.137	1.4	0.14	60	60
Chang et al. (2020)	Australia	Oceania	CRM + Enzyme	Drying + enzyme	31-40	10	Ross	35	FCR	1.37	0.137	1.53	0.153	60	60
Chang et al. (2020)	Australia	Oceania	CRM + Enzyme	Drying + enzyme	41-50	10	Ross	35	FCR	1.37	0.137	1.67	0.167	60	60
Yadav et al. (2019)	USA	North America	CRM	Drying	11.0-20	<10	Cobb	42	FCR	1.59	0.159	1.73	0.173	36	36
Yadav et al. (2019)	USA	North America	CRM	Drying	21-30	<10	Cobb	42	FCR	1.59	0.159	1.73	0.173	36	36
Yadav et al. (2019)	USA	North America	CRM	Drying	31-40	<10	Cobb	42	FCR	1.59	0.159	1.82	0.182	36	36
Yadav et al. (2019)	USA	North America	CRM	Drying	41-50	<10	Cobb	42	FCR	1.59	0.159	1.82	0.182	36	36
Ghomsi et al. (2017)	Cameroon	Africa	CPM	Drying	1.0-10	>10	Arbor Acres	46	FCR	2.71	0.271	3.5	0.35	86	86
Elnour et al. (2020)	Sudan	Africa	CRM	Drying	11.0-20	10	Ross	35	FCR	1.5	0.15	1.55	0.155	40	40
Elnour et al. (2020)	Sudan	Africa	CRM	Drying	21-30	10	Ross	35	FCR	1.5	0.15	1.54	0.154	40	40
Elnour et al. (2020)	Sudan	Africa	CRM	Drying	31-40	10	Ross	35	FCR	1.5	0.15	1.58	0.158	40	40
Hassan et al. (2012)	Nigeria	Africa	CRM	Drying	11.0-20	<10	Marshal	56	FCR	2.75	0.275	5.41	0.541	18	18
Hassan et al. (2012)	Nigeria	Africa	CRM	Drying	31-40	<10	Marshal	56	FCR	2.75	0.275	1.76	0.176	18	18
Hassan et al. (2012)	Nigeria	Africa	CRM	Drying	41-50	<10	Marshal	56	FCR	2.75	0.275	1.75	0.175	18	18
Hassan et al. (2012)	Nigeria	Africa	CRM	Drying	51-60	<10	Marshal	56	FCR	2.75	0.275	1.52	0.152	18	18
Zanu et al. (2017)	Ghana	Africa	CRM	Drying	51-60	>10	Cobb	42	FCR	2.62	0.262	3.03	0.303	45	45
Nsa et al. (2019)	Nigeria	Africa	CRM	Drying	11.0-20	>10	Arbor Acres	42	FCR	2.75	0.275	2.86	0.286	48	48
Nsa et al. (2019)	Nigeria	Africa	CRM	Drying	21-30	>10	Arbor Acres	42	FCR	2.75	0.275	3.06	0.306	48	48
Nsa et al. (2019)	Nigeria	Africa	CRM	Drying	41-50	>10	Arbor Acres	42	FCR	2.75	0.275	3.7	0.37	48	48
Nsa et al. (2019)	Nigeria	Africa	CRM	Drying	51-60	>10	Arbor Acres	42	FCR	2.75	0.275	5.08	0.508	48	48
Diarra et al. (2015)	Samoa	Oceania	CRM + Enzyme	Drying + enzyme	31-40	<10	Cobb	42	FCR	1.76	0.176	1.02	0.102	48	48
Olowoyeye (2022)	Nigeria	Africa	CPM+CLM	Drying	11.0-20	10	Marshal	42	FCR	1.74	0.174	1.95	0.195	50	50
Olowoyeye (2022)	Nigeria	Africa	CPM+CLM	Drying	11.0-20	10	Marshal	42	FCR	1.74	0.174	2.09	0.209	50	50
Olowoyeye (2022)	Nigeria	Africa	CPM+CLM	Drying	11.0-20	10	Marshal	42	FCR	1.74	0.174	2.15	0.215	50	50
Olowoyeye (2022)	Nigeria	Africa	CPM+CLM	Drying	21-30	10	Marshal	42	FCR	1.74	0.174	2.21	0.221	50	50
Olowoyeye (2022)	Nigeria	Africa	CPM+CLM	Drying	21-30	10	Marshal	42	FCR	1.74	0.174	2.31	0.231	50	50
Ehebha and Eguaoje (2018)	Nigeria	Africa	CPM	Drying	11.0-20	10	Anak	56	FCR	2.5	0.25	2.11	0.211	30	30
Ehebha and Eguaoje (2018)	Nigeria	Africa	CPM	Drying	11.0-20	10	Anak	56	FCR	2.5	0.25	2.56	0.256	30	30
Ehebha and Eguaoje (2018)	Nigeria	Africa	CPM	Drying	21-30	10	Anak	56	FCR	2.5	0.25	2.33	0.233	30	30
Ogundu et al. (2017)	Nigeria	Africa	CRM	Drying	31-40	<10	Anak	56	FCR	2.75	0.275	3.52	0.352	24	24
Ogundu et al. (2017)	Nigeria	Africa	CRM	Drying	31-40	<10	Anak	56	FCR	2.75	0.275	3.26	0.326	24	24
Osei and Duodu (1988)	Ghana	Africa	WFCPM	WF + drying	1.0-10	<10	Cobb	42	FCR	2.37	0.237	2.22	0.222	120	120
Osei and Duodu (1988)	Ghana	Africa	WFCPM	WF + drying	1.0-10	<10	Cobb	42	FCR	2.37	0.237	2.34	0.234	120	120
Osei and Duodu (1988)	Ghana	Africa	WFCPM	WF + drying	11.0-20	<10	Cobb	42	FCR	2.37	0.237	2.37	0.237	120	120
Chukwukaelo et al.(2018)	Nigeria	Africa	SSFCRM	SSF+Drying	1.0-10	10		56	FCR	2.33	0.233	2.42	0.242	30	30
Chukwukaelo et al.(2018)	Nigeria	Africa	SSFCRM	SSF+Drying	11.0-20	10		56	FCR	2.33	0.233	2.32	0.232	30	30
Chukwukaelo et al.(2018)	Nigeria	Africa	SSFCRM	SSF+Drying	21-30	10		56	FCR	2.33	0.233	2.62	0.262	30	30
Chukwukaelo et al.(2018)	Nigeria	Africa	SSFCRM	SSF+Drying	31-40	10		56	FCR	2.33	0.233	2.5	0.25	30	30
Ewa et al. (2019)	Nigeria	Africa	CRS	Drying	11.0-20	10	Anak	49	FCR	3.15	0.315	2.98	0.298	30	30
Ewa et al. (2019)	Nigeria	Africa	CRS	Drying	11.0-20	10	Anak	49	FCR	3.15	0.315	3.25	0.325	30	30
Ewa et al. (2019)	Nigeria	Africa	CRS	Drying	11.0-20	10	Anak	49	FCR	3.15	0.315	3.03	0.303	30	30
Ewa et al. (2019)	Nigeria	Africa	CRS	Drying	11.0-20	10	Anak	49	FCR	3.15	0.315	3.33	0.333	30	30
Babatunde (2013)	Fiji	Oceania	CRW	Drying	11.0-20	10	Cobb	46	FCR	2.3	0.23	2.3	0.23	30	30
Babatunde (2013)	Fiji	Oceania	CRW	Drying	11.0-20	10	Cobb	46	FCR	2.3	0.23	2.8	0.28	30	30
Babatunde (2013)	Fiji	Oceania	CRW	Drying	21-30	10	Cobb	46	FCR	2.3	0.23	2.9	0.29	30	30
Ojewola et al. (2016)	Nigeria	Africa	WFCRM	WF + drying	1.0-10	10	Anak	56	FCR	1.7	0.17	1.99	0.199	20	20
Ojewola et al. (2016)	Nigeria	Africa	WFCRM	WF + drying	11.0-20	10	Anak	56	FCR	1.7	0.17	2.38	0.238	20	20
Ojewola et al. (2016)	Nigeria	Africa	WFCRM	WF + drying	11.0-20	10	Anak	56	FCR	1.7	0.17	2.92	0.292	20	20
Ojewola et al. (2016)	Nigeria	Africa	WFCRM	WF + drying	21-30	10	Anak	56	FCR	1.7	0.17	2.82	0.282	20	20
Ojewola et al. (2016)	Nigeria	Africa	WFCRM	WF + drying	21-30	10	Anak	56	FCR	1.7	0.17	2.56	0.256	20	20
Ojewola et al. (2016)	Nigeria	Africa	WFCRM	WF + drying	31-40	10	Anak	56	FCR	1.7	0.17	2.56	0.256	20	20
Ojewola et al. (2016)	Nigeria	Africa	WFCRM	WF + drying	41-50	10	Anak	56	FCR	1.7	0.17	2.36	0.236	20	20
Ojewola et al. (2016)	Nigeria	Africa	WFCRM	WF + drying	41-50	10	Anak	56	FCR	1.7	0.17	2.35	0.235	20	20
Ojewola et al. (2016)	Nigeria	Africa	WFCRM	WF + drying	51-60	10	Anak	56	FCR	1.7	0.17	2.52	0.252	20	20
Ojewola et al. (2016)	Nigeria	Africa	WFCRM	WF + drying	51-60	10	Anak	56	FCR	1.7	0.17	2.62	0.262	20	20
Midau et al. (2011)	Nigeria	Africa	CPM + Enzyme	Drying + enzyme	11.0-20	<10	Anak	56	FCR	2.98	0.298	3.09	0.309	24	24
Midau et al. (2011)	Nigeria	Africa	CPM + Enzyme	Drying + enzyme	21-30	<10	Anak	56	FCR	2.98	0.298	3.02	0.302	24	24
Midau et al. (2011)	Nigeria	Africa	CPM + Enzyme	Drying + enzyme	31-40	<10	Anak	56	FCR	2.98	0.298	4.87	0.487	24	24
Midau et al. (2011)	Nigeria	Africa	CPM + Enzyme	Drying + enzyme	41-50	<10	Anak	56	FCR	2.98	0.298	5.2	0.52	24	24
Aro et al. (2012)	Nigeria	Africa	SSFCPM	SSF+Drying	11.0-20	10	Ross	56	FCR	2.56	0.56	3.21	0.321	50	50
Aro et al. (2012)	Nigeria	Africa	SSFCPM	SSF+Drying	31-40	10	Ross	56	FCR	2.56	0.56	3.41	0.341	50	50
Aro et al. (2012)	Nigeria	Africa	SSFCPM	SSF+Drying	51-60	10	Ross	56	FCR	2.56	0.56	3.73	0.373	50	50
Aro et al. (2012)	Nigeria	Africa	SSFCPM	SSF+Drying	11.0-20	10	Ross	56	FCR	2.56	0.56	3.01	0.301	50	50
Aro et al. (2012)	Nigeria	Africa	SSFCPM	SSF+Drying	31-40	10	Ross	56	FCR	2.56	0.56	2.63	0.263	50	50
Aro et al. (2012)	Nigeria	Africa	SSFCPM	SSF+Drying	51-60	10	Ross	56	FCR	2.56	0.56	2.79	0.279	50	50
Abu et al. (2015)	Nigeria	Africa	CPM+CLM	Drying	11.0-20	>10	Arbor Acres	49	FCR	2.32	0.232	2.46	0.246	45	45
Tamburawa et al. (2019)	Nigeria	Africa	CRM	Drying	1.0-10	<10	Marshal	56	FCR	3.12	0.312	3.04	0.304	18	18
Tamburawa et al. (2019)	Nigeria	Africa	CRM	Drying	11.0-20	<10	Marshal	56	FCR	3.12	0.312	3.25	0.325	18	18
Tamburawa et al. (2019)	Nigeria	Africa	CRM	Drying	21-30	<10	Marshal	56	FCR	3.12	0.312	2.7	0.27	18	18
Tamburawa et al. (2019)	Nigeria	Africa	CRM	Drying	31-40	<10	Marshal	56	FCR	3.12	0.312	3.34	0.334	18	18
Adekeye et al (2021)	Nigeria	Africa	CPM	Drying	11.0-20	>10	Arbor Acres	42	FCR	2.06	0.206	1.63	0.163	80	80
Adekeye et al (2021)	Nigeria	Africa	CPM	Drying	11.0-20	>10	Arbor Acres	42	FCR	2.06	0.206	2.05	0.205	80	80
Adekeye et al (2021)	Nigeria	Africa	CPM	Drying	21-30	>10	Arbor Acres	42	FCR	2.06	0.206	1.78	0.178	80	80
Adekeye et al (2021)	Nigeria	Africa	CPM	Drying	21-30	>10	Arbor Acres	42	FCR	2.06	0.206	2.24	0.224	80	80

## Sheet: ADG
Reference	Country	Continent	Form	Method	Inclusion level	Replication	Number per replicate	Strain	Duration	Outcome	Cont mean	Cont SD	Expt mean	Expt SD	N cont	Nexpt
Bhuiyan and Iji (2015)	Australia	Oceania	CRM	Drying	51-60	8	10	Cobb	21	ADG	33.15	3.315	21.6	2.16	64	64
Bhuiyan and Iji (2015)	Australia	Oceania	CRM	Drying	51-60	8	10	Cobb	21	ADG	33.15	3.315	30.34	3.034	64	64
Bhuiyan and Iji (2015)	Australia	Oceania	CRM + Enzyme	Drying + enzyme	51-60	8	10	Cobb	21	ADG	41.99	4.199	27.36	2.736	64	64
Bhuiyan and Iji (2015)	Australia	Oceania	CRM + Enzyme	Drying + enzyme	51-60	8	10	Cobb	21	ADG	41.99	4.199	35.69	3.569	64	64
Oyewole et al. (2020)	Nigeria	Africa	CRM	Drying	11.0-20				56	ADG	41.4	4.14	41.4	4.14	30	30
Oyewole et al. (2020)	Nigeria	Africa	CRM	Drying	11.0-20				56	ADG	41.4	4.14	40.3	4.03	30	30
Oyewole et al. (2020)	Nigeria	Africa	CRM	Drying	31-40				56	ADG	41.4	4.14	39.6	3.96	30	30
Chang et al. (2020)	Australia	Oceania	CRM	Drying	11.0-20	6	10	Ross	35	ADG	66.55	6.655	65.69	6.569	60	60
Chang et al. (2020)	Australia	Oceania	CRM	Drying	31-40	6	10	Ross	35	ADG	66.55	6.655	58.32	5.832	60	60
Chang et al. (2020)	Australia	Oceania	CRM	Drying	41-50	6	10	Ross	35	ADG	66.55	6.655	56.79	5.679	60	60
Chang et al. (2020)	Australia	Oceania	CRM + Enzyme	Drying + enzyme	11.0-20	6	10	Ross	35	ADG	70.41	7.041	68.86	6.886	60	60
Chang et al. (2020)	Australia	Oceania	CRM + Enzyme	Drying + enzyme	31-40	6	10	Ross	35	ADG	70.41	7.041	66.14	6.614	60	60
Chang et al. (2020)	Australia	Oceania	CRM + Enzyme	Drying + enzyme	41-50	6	10	Ross	35	ADG	70.41	7.041	59.15	5.915	60	60
Yadav et al. (2019)	USA	North America	CRM	Drying	11.0-20	6	<10	Cobb	42	ADG	60.67	6.067	56	5.6	36	36
Yadav et al. (2019)	USA	North America	CRM	Drying	21-30	6	<10	Cobb	42	ADG	60.67	6.067	57	5.7	36	36
Yadav et al. (2019)	USA	North America	CRM	Drying	31-40	6	<10	Cobb	42	ADG	60.67	6.067	54.33	5.433	36	36
Yadav et al. (2019)	USA	North America	CRM	Drying	41-50	6	<10	Cobb	42	ADG	60.67	6.067	50.67	5.067	36	36
Ghomsi et al. (2017)	Cameroon	Africa	CPM	Drying	1.0-10	7	>10	Arbor Acres	46	ADG	32	3.2	24.02	2.402	86	86
Elnour et al. (2020)	Sudan	Africa	CRM	Drying	11.0-20	4	10	Ross	35	ADG	61.02	6.102	56.88	5.688	40	40
Elnour et al. (2020)	Sudan	Africa	CRM	Drying	21-30	4	10	Ross	35	ADG	61.02	6.102	57.7	5.77	40	40
Elnour et al. (2020)	Sudan	Africa	CRM	Drying	31-40	4	10	Ross	35	ADG	61.02	6.102	53.49	5.349	40	40
Hassan et al. (2012)	Nigeria	Africa	CRM	Drying	11.0-20	3	<10	Marshal	56	ADG	67.28	6.728	33.76	3.376	18	18
Hassan et al. (2012)	Nigeria	Africa	CRM	Drying	31-40	3	<10	Marshal	56	ADG	67.28	6.728	31.88	3.188	18	18
Hassan et al. (2012)	Nigeria	Africa	CRM	Drying	41-50	3	<10	Marshal	56	ADG	67.28	6.728	30.28	3.028	18	18
Hassan et al. (2012)	Nigeria	Africa	CRM	Drying	51-60	3	<10	Marshal	56	ADG	67.28	6.728	29.33	2.933	18	18
Zanu et al. (2017)	Ghana	Africa	CRM	Drying	51-60	3	>10	Cobb	42	ADG	46.77	4.677	36.95	3.695	45	45
Nsa et al. (2019)	Nigeria	Africa	CRM	Drying	11.0-20	3	>10	Arbor Acres	42	ADG	41.16	4.116	39.43	3.943	48	48
Nsa et al. (2019)	Nigeria	Africa	CRM	Drying	21-30	3	>10	Arbor Acres	42	ADG	41.16	4.116	33.47	3.347	48	48
Nsa et al. (2019)	Nigeria	Africa	CRM	Drying	41-50	3	>10	Arbor Acres	42	ADG	41.16	4.116	25.25	2.525	48	48
Nsa et al. (2019)	Nigeria	Africa	CRM	Drying	51-60	3	>10	Arbor Acres	42	ADG	41.16	4.116	16.91	1.691	48	48
Diarra et al. (2015)	Samoa	Oceania	CRM + Enzyme	Drying + enzyme	31-40	4	<10	Cobb	42	ADG	72.63	7.263	49.63	4.963	48	48
Olowoyeye (2022)	Nigeria	Africa	CPM+CLM	Drying	11.0-20	5	10	Marshal	42	ADG	56.28	5.628	50.86	5.086	50	50
Olowoyeye (2022)	Nigeria	Africa	CPM+CLM	Drying	11.0-20	5	10	Marshal	42	ADG	56.28	5.628	47.71	4.771	50	50
Olowoyeye (2022)	Nigeria	Africa	CPM+CLM	Drying	11.0-20	5	10	Marshal	42	ADG	56.28	5.628	46.57	4.657	50	50
Olowoyeye (2022)	Nigeria	Africa	CPM+CLM	Drying	21-30	5	10	Marshal	42	ADG	56.28	5.628	45.43	4.543	50	50
Olowoyeye (2022)	Nigeria	Africa	CPM+CLM	Drying	21-30	5	10	Marshal	42	ADG	56.28	5.628	43.71	4.371	50	50
Ehebha and Eguaoje (2018)	Nigeria	Africa	CPM	Drying	11.0-20	3	10	Anak	56	ADG	42.02	4.202	47.21	4.721	30	30
Ehebha and Eguaoje (2018)	Nigeria	Africa	CPM	Drying	11.0-20	3	10	Anak	56	ADG	42.02	4.202	30.13	3.013	30	30
Ehebha and Eguaoje (2018)	Nigeria	Africa	CPM	Drying	21-30	3	10	Anak	56	ADG	42.02	4.202	26.24	2.624	30	30
Ogundu et al. (2017)	Nigeria	Africa	CRM	Drying	31-40	3	<10	Anak	56	ADG	19.67	1.967	14	1.4	24	24
Ogundu et al. (2017)	Nigeria	Africa	CRM	Drying	31-40	3	<10	Anak	57	ADG	19.67	1.967	15	1.5	24	24
Osei and Duodu (1988)	Ghana	Africa	WFCPM	WF + drying	1.0-10	3	<10	Cobb	42	ADG	16.9	1.69	18.59	1.859	120	120
Osei and Duodu (1988)	Ghana	Africa	WFCPM	WF + drying	1.0-10	3	<10	Cobb	42	ADG	16.9	1.69	17.9	1.79	120	120
Osei and Duodu (1988)	Ghana	Africa	WFCPM	WF + drying	11.0-20	3	<10	Cobb	42	ADG	16.9	1.69	17.7	1.77	120	120
Chukwukaelo et al.(2018)	Nigeria	Africa	SSFCRM	SSF+Drying	1.0-10	3	10		56	ADG	49.76	4.976	49	4.9	30	30
Chukwukaelo et al.(2018)	Nigeria	Africa	SSFCRM	SSF+Drying	11.0-20	3	10		56	ADG	49.76	4.976	48.61	4.861	30	30
Chukwukaelo et al.(2018)	Nigeria	Africa	SSFCRM	SSF+Drying	21-30	3	10		56	ADG	49.76	4.976	46.08	4.608	30	30
Chukwukaelo et al.(2018)	Nigeria	Africa	SSFCRM	SSF+Drying	31-40	3	10		56	ADG	49.76	4.976	48.72	4.872	30	30
Ewa et al. (2019)	Nigeria	Africa	CRS	Drying	11.0-20	3	10	Anak	49	ADG	27.48	2.748	28.98	2.898	30	30
Ewa et al. (2019)	Nigeria	Africa	CRS	Drying	11.0-20	3	10	Anak	49	ADG	27.48	2.748	25.44	2.544	30	30
Ewa et al. (2019)	Nigeria	Africa	CRS	Drying	11.0-20	3	10	Anak	49	ADG	27.48	2.748	26.94	2.694	30	30
Ewa et al. (2019)	Nigeria	Africa	CRS	Drying	11.0-20	3	10	Anak	49	ADG	27.48	2.748	24.56	2.456	30	30
Babatunde (2013)	Fiji	Oceania	CRW	Drying	11.0-20	3	10	Cobb	46	ADG	41.85	4.185	43.7	4.37	30	30
Babatunde (2013)	Fiji	Oceania	CRW	Drying	11.0-20	3	10	Cobb	46	ADG	41.85	4.185	33.7	3.37	30	30
Babatunde (2013)	Fiji	Oceania	CRW	Drying	21-30	3	10	Cobb	46	ADG	41.85	4.185	31.11	3.111	30	30
Ojewola et al. (2016)	Nigeria	Africa	WFCRM	WF + drying	1.0-10	2	10	Anak	56	ADG	54.38	5.438	49.91	4.991	20	20
Ojewola et al. (2016)	Nigeria	Africa	WFCRM	WF + drying	11.0-20	2	10	Anak	56	ADG	54.38	5.438	42.77	4.277	20	20
Ojewola et al. (2016)	Nigeria	Africa	WFCRM	WF + drying	11.0-20	2	10	Anak	56	ADG	54.38	5.438	39.2	3.92	20	20
Ojewola et al. (2016)	Nigeria	Africa	WFCRM	WF + drying	21-30	2	10	Anak	56	ADG	54.38	5.438	35.63	3.563	20	20
Ojewola et al. (2016)	Nigeria	Africa	WFCRM	WF + drying	21-30	2	10	Anak	56	ADG	54.38	5.438	40.98	4.098	20	20
Ojewola et al. (2016)	Nigeria	Africa	WFCRM	WF + drying	31-40	2	10	Anak	56	ADG	54.38	5.438	39.19	3.919	20	20
Ojewola et al. (2016)	Nigeria	Africa	WFCRM	WF + drying	41-50	2	10	Anak	56	ADG	54.38	5.438	40.09	4.009	20	20
Ojewola et al. (2016)	Nigeria	Africa	WFCRM	WF + drying	41-50	2	10	Anak	56	ADG	54.38	5.438	40.98	4.098	20	20
Ojewola et al. (2016)	Nigeria	Africa	WFCRM	WF + drying	51-60	2	10	Anak	56	ADG	54.38	5.438	38.3	3.83	20	20
Ojewola et al. (2016)	Nigeria	Africa	WFCRM	WF + drying	51-60	2	10	Anak	56	ADG	54.38	5.438	37.41	3.741	20	20
Midau et al. (2011)	Nigeria	Africa	CPM + Enzyme	Drying + enzyme	11.0-20	3	<10	Anak	56	ADG	34.5	3.45	33.43	3.343	24	24
Midau et al. (2011)	Nigeria	Africa	CPM + Enzyme	Drying + enzyme	21-30	3	<10	Anak	56	ADG	34.5	3.45	34.3	3.43	24	24
Midau et al. (2011)	Nigeria	Africa	CPM + Enzyme	Drying + enzyme	31-40	3	<10	Anak	56	ADG	34.5	3.45	20.17	2.017	24	24
Midau et al. (2011)	Nigeria	Africa	CPM + Enzyme	Drying + enzyme	41-50	3	<10	Anak	56	ADG	34.5	3.45	18.8	1.88	24	24
Aro et al. (2012)	Nigeria	Africa	SSFCPM	SSF+Drying	11.0-20	5	10	Ross	56	ADG	25.64	2.564	21.93	2.193	50	50
Aro et al. (2012)	Nigeria	Africa	SSFCPM	SSF+Drying	31-40	5	10	Ross	56	ADG	25.64	2.564	24.12	2.412	50	50
Aro et al. (2012)	Nigeria	Africa	SSFCPM	SSF+Drying	51-60	5	10	Ross	56	ADG	25.64	2.564	24.26	2.426	50	50
Aro et al. (2012)	Nigeria	Africa	SSFCPM	SSF+Drying	11.0-20	5	10	Ross	56	ADG	25.64	2.564	22.59	2.259	50	50
Aro et al. (2012)	Nigeria	Africa	SSFCPM	SSF+Drying	31-40	5	10	Ross	56	ADG	25.64	2.564	22.58	2.258	50	50
Aro et al. (2012)	Nigeria	Africa	SSFCPM	SSF+Drying	51-60	5	10	Ross	56	ADG	25.64	2.564	20.63	2.063	50	50
Abu et al. (2015)	Nigeria	Africa	CPM+CLM	Drying	11.0-20	3	>10	Arbor Acres	49	ADG	45.1	4.51	42.8	4.28	45	45
Tamburawa et al. (2019)	Nigeria	Africa	CRM	Drying	1.0-10	3	<10	Marshal	56	ADG	59.71	5.971	56.85	5.685	18	18
Tamburawa et al. (2019)	Nigeria	Africa	CRM	Drying	11.0-20	3	<10	Marshal	56	ADG	59.71	5.971	59.65	5.965	18	18
Tamburawa et al. (2019)	Nigeria	Africa	CRM	Drying	21-30	3	<10	Marshal	56	ADG	59.71	5.971	68.27	6.827	18	18
Tamburawa et al. (2019)	Nigeria	Africa	CRM	Drying	31-40	3	<10	Marshal	56	ADG	59.71	5.971	55.56	5.556	18	18
Adekeye et al (2021)	Nigeria	Africa	CPM	Drying	11.0-20	5	>10	Arbor Acres	42	ADG	55.24	5.524	69.52	6.952	80	80
Adekeye et al (2021)	Nigeria	Africa	CPM	Drying	11.0-20	5	>10	Arbor Acres	42	ADG	55.24	5.524	55.71	5.571	80	80
Adekeye et al (2021)	Nigeria	Africa	CPM	Drying	21-30	5	>10	Arbor Acres	42	ADG	55.24	5.524	65.71	6.571	80	80
Adekeye et al (2021)	Nigeria	Africa	CPM	Drying	21-30	5	>10	Arbor Acres	42	ADG	55.24	5.524	47.14	4.714	80	80
